# Supplementary material for: Rap1 binding and a lipid-dependent helix in talin F1 domain promote integrin activation in tandem
Source: PubMed Central journal article supplement — J Cell Biol. 2019 Apr 15;218(6):1799–809. doi: 10.1083/jcb.201810061 (PMC6548133; doi:10.1083/jcb.201810061), 2019-04-15
Supplement: JCB_201810061_sm.pdf [file JCB_201810061_sm.pdf]

Supplemental material

Gingras et al., <https://doi.org/10.1083/jcb.201810061>

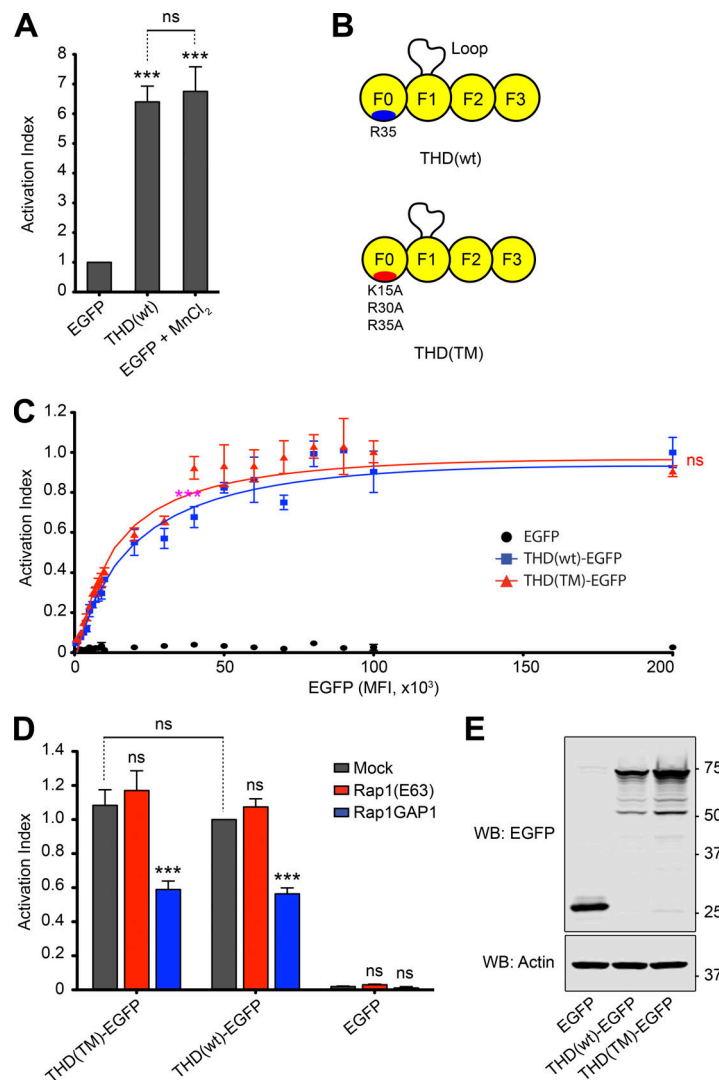

Figure S1. **THD(wt)-EGFP, THD(TM)-EGFP, and MnCl<sub>2</sub> show similar levels of integrin activation.** (A) THD and Mn<sup>++</sup> activate integrin αIIbβ<sub>3</sub> to a similar extent. A5 cells stably expressing αIIbβ<sub>3</sub> integrin were transfected with cDNA encoding EGFP or THD-EGFP. Integrin activation was assayed by binding of PAC1 to EGFP-positive cells in the presence or absence of 1 mM MnCl<sub>2</sub>. Bar graphs represent mean ± SEM of three independent experiments normalized to the EGFP condition. Two-way ANOVA with Bonferroni post-test. Each condition was compared with the EGFP control. \*\*\*, P < 0.001. (B) THD constructs used in C–E. (C and D) Talin1(K15A,R30A,R35A) triple mutation (TM) does not impede αIIbβ<sub>3</sub> integrin activation in A5 cells. A5 cells stably expressing αIIbβ<sub>3</sub> integrin were transfected with cDNA encoding THD-EGFP alone (C) or in combination with Rap1(Q63E) or Rap1GAP1 (D). Integrin activation was assayed by binding of PAC1 to EGFP-positive cells. Transfection of EGFP alone was used as control. (C) Activation indices were normalized to the maximum value of THD(wt)-EGFP and plotted as a function of EGFP MFI. Graphs represent mean ± SEM of three independent experiments. Curve fitting was performed using the total one-site-binding model in Prism 5.0. Two-way ANOVA with Bonferroni post-test. Each mutant was compared with THD. (D) Bar graphs represent mean ± SEM of three independent experiments normalized to THD(wt)-EGFP + mock. Two-way ANOVA with Bonferroni post-test. Each condition was compared with the respective mock control. \*\*\*, P < 0.001. No significant differences between WT and the triple mutant were detected. (E) Expression of the THD(TM)-EGFP triple mutant was assayed by WB.

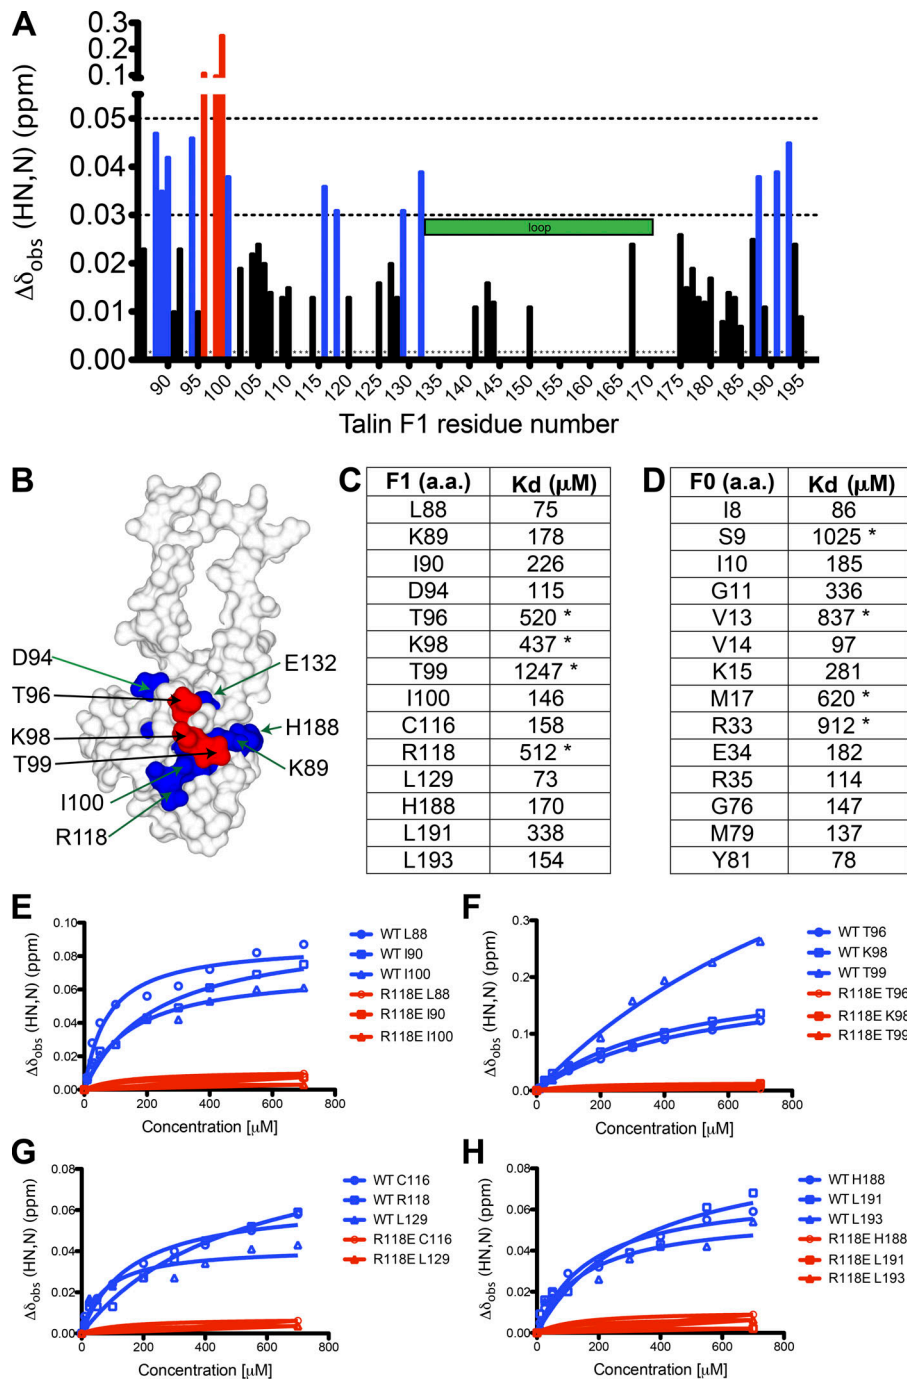

Figure S2. **Characterization of Rap1 binding to talin F1 subdomain by NMR.** (A) Summary of chemical shift changes as a plot against the residue number of F1 for assigned residues with high confidence using the previously assigned spectra from (Goult et al., 2010). (B) Mapping of the significant changes on the F1 structure with the same color code as in A. (C and D) The calculated apparent  $K_d$  values using amino acid backbone amide chemical shift perturbations for the talin1 F1 (C) and F0 domains (D). The apparent  $K_d$  values are observed in similar micromolar ranges, suggesting similar affinities of F1 and F0 for Rap1b. The asterisks highlight the larger values. (E–H) Titration curves for the interaction of talin1 F1 with Rap1b for residues assigned with confidence using the previously published assignment (Goult et al., 2010).

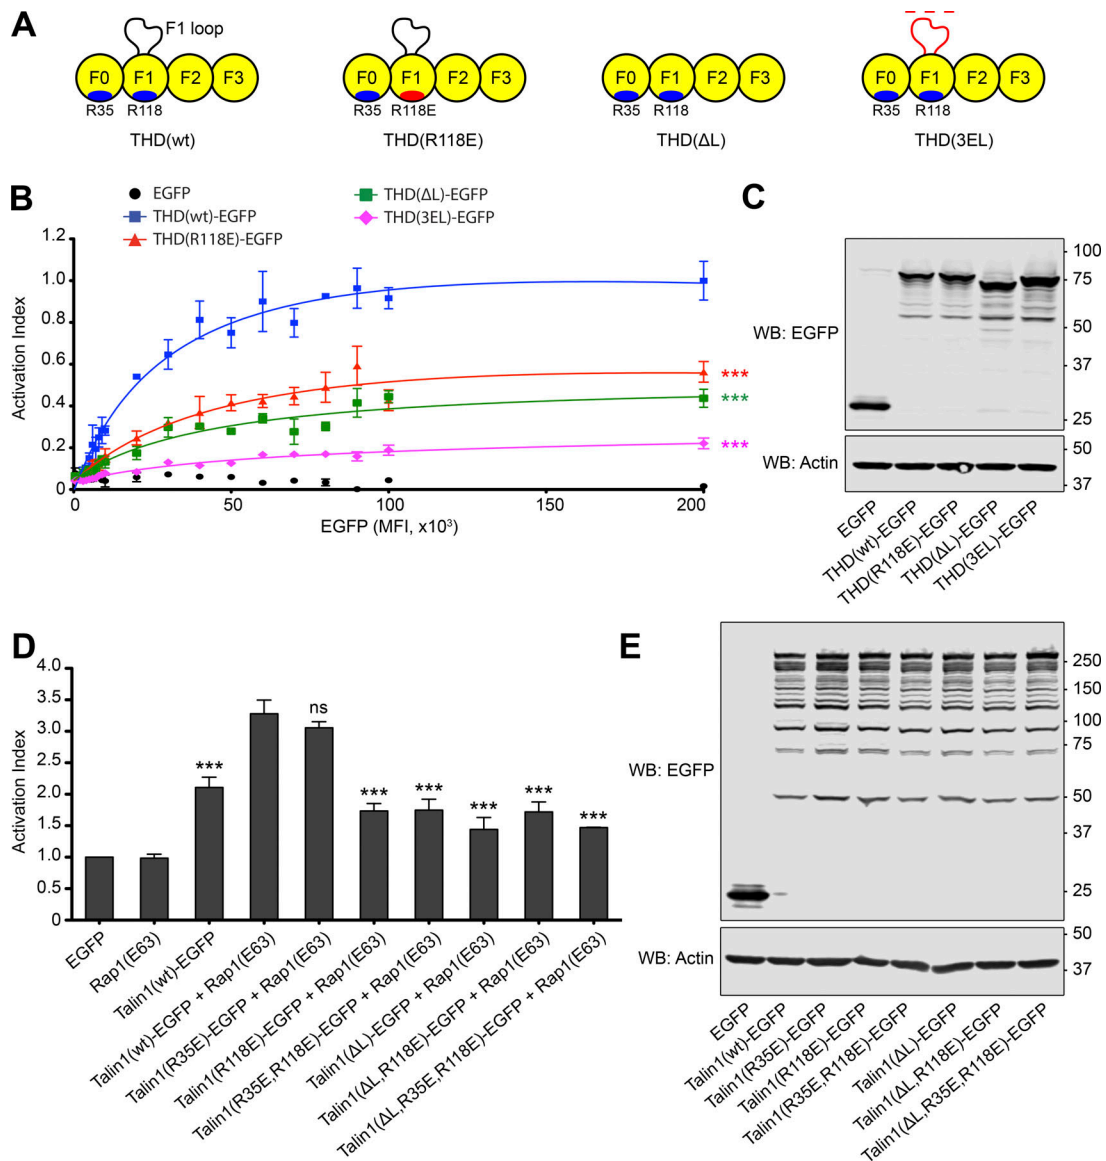

Figure S3. **The role of talin1 basic residues of the F1 loop and full-length talin1 mutants in integrin activation.** (A) THD constructs used in B and C. (B) A5 cells stably expressing αIIbβ3 integrin were transfected with cDNA encoding THD-EGFP. Integrin activation was assayed by binding of PAC1 to EGFP-positive cells. Transfection of EGFP alone was used as control. Activation indices were normalized to the maximum value of THD(wt)-EGFP and plotted as a function of EGFP MFI. Graphs represent mean ± SEM of three independent experiments. Curve fitting was performed using the total one-site binding model in Prism 5.0. Two-way ANOVA with Bonferroni post-test. Each mutant was compared with THD. \*\*\*, P < 0.01. (C) WB of THD-EGFP expression. Actin was used as a loading control. (D) A5 cells stably expressing αIIbβ3 integrin were transfected with cDNA encoding full-length talin1 fused to EGFP in combination with Rap1(Q63E). Integrin activation was assayed by binding of PAC1 to EGFP-positive cells. Bar graphs represent mean ± SEM of three independent experiments normalized to talin1(wt)-EGFP alone. One-way ANOVA with Bonferroni post-test. Each condition was compared with the talin1(wt)-EGFP alone control. \*\*\*, P < 0.001. (E) WB of talin1-EGFP expression. Actin was used as a loading control.

## Reference

Goult, B.T., M. Bouaouina, P.R. Elliott, N. Bate, B. Patel, A.R. Gingras, J.G. Grossmann, G.C. Roberts, D.A. Calderwood, D.R. Critchley, and I.L. Barsukov. 2010. Structure of a double ubiquitin-like domain in the talin head: a role in integrin activation. *EMBO J.* 29:1069–1080. <https://doi.org/10.1038/emboj.2010.4>
